# Supplementary material for: Expression of alternatively spliced variants of the Dclk1 gene is regulated by psychotropic drugs
Source: BMC Neurosci. 2018 Sep 12;19:55. doi: 10.1186/s12868-018-0458-4 (PMC6134793; doi:10.1186/s12868-018-0458-4)
Supplement: Supplementary file 1 — Additional file 1. The lists of transcripts and corresponding gene names that are altered by drug treatment after one-way ANOVA in each tissue (FDR < 0.0001). [file 12868_2018_458_MOESM1_ESM.xlsx]

## Sheet: transcripts-tissue
NAc				PFCx				NAc and PFCx
Transcript ID Ensembl	Gene ID Ensembl	Gene name		Transcript ID Ensembl	Gene ID Ensembl	Gene name		Transcript ID Ensembl	Gene ID Ensembl	Gene name
ENSMUST00000000543	ENSMUSG00000000531	Grasp		ENSMUST00000000080	ENSMUSG00000000078	Klf6		ENSMUST00000003640	ENSMUSG00000003545	Fosb
ENSMUST00000003310	ENSMUSG00000003226	Ranbp2		ENSMUST00000000188	ENSMUSG00000000184	Ccnd2		ENSMUST00000020145	ENSMUSG00000019970	Sgk1
ENSMUST00000003635	ENSMUSG00000003541	Ier3		ENSMUST00000007433	ENSMUSG00000098306	Gm28040		ENSMUST00000020308	ENSMUSG00000020108	Ddit4
ENSMUST00000009790	ENSMUSG00000009646	Pla2g12b		ENSMUST00000011492	ENSMUSG00000027710	Acad9		ENSMUST00000021413	ENSMUSG00000021025	Nfkbia
ENSMUST00000020692	ENSMUSG00000020423	Btg2		ENSMUST00000016670	ENSMUSG00000016526	Dyrk3		ENSMUST00000021674	ENSMUSG00000021250	Fos
ENSMUST00000023268	ENSMUSG00000022602	Arc		ENSMUST00000020118	ENSMUSG00000019960	Dusp6		ENSMUST00000023779	ENSMUSG00000023034	Nr4a1
ENSMUST00000023829	ENSMUSG00000023067	Cdkn1a		ENSMUST00000020579	ENSMUSG00000020330	Hmmr		ENSMUST00000024839	ENSMUSG00000024042	Sik1
ENSMUST00000025025	ENSMUSG00000024190	Dusp1		ENSMUST00000021135	ENSMUSG00000020783	Ncbp3		ENSMUST00000029846	ENSMUSG00000028195	Cyr61
ENSMUST00000025236	ENSMUSG00000024378	Stard4		ENSMUST00000022212	ENSMUSG00000021701	Plk2		ENSMUST00000035101	ENSMUSG00000032515	Csrnp1
ENSMUST00000025767	ENSMUSG00000024847	Aip		ENSMUST00000023610	ENSMUSG00000022893	Adamts1		ENSMUST00000039388	ENSMUSG00000034936	Arl4d
ENSMUST00000030047	ENSMUSG00000028362	Tnfsf8		ENSMUST00000025003	ENSMUSG00000024176	Sox8		ENSMUST00000042818	ENSMUSG00000035828	Pim3
ENSMUST00000030623	ENSMUSG00000028820	Sfpq		ENSMUST00000027215	ENSMUSG00000026049	Tex30		ENSMUST00000047906	ENSMUSG00000034640	Tiparp
ENSMUST00000031017	ENSMUSG00000029135	Fosl2		ENSMUST00000028111	ENSMUSG00000026770	Il2ra		ENSMUST00000064922	ENSMUSG00000052837	Junb
ENSMUST00000033053	ENSMUSG00000030789	Itgax		ENSMUST00000028829	ENSMUSG00000027351	Spred1		ENSMUST00000069620	ENSMUSG00000055866	Per2
ENSMUST00000035908	ENSMUSG00000033730	Egr3		ENSMUST00000029421	ENSMUSG00000027832	Ptx3		ENSMUST00000082432	ENSMUSG00000007682	Dio2
ENSMUST00000036884	ENSMUSG00000033863	Klf9		ENSMUST00000031446	ENSMUSG00000070498	Tmem132b		ENSMUST00000102752	ENSMUSG00000007617	Homer1
ENSMUST00000037029	ENSMUSG00000033960	9430020K01Rik		ENSMUST00000032194	ENSMUSG00000030103	Bhlhe40		ENSMUST00000108229	ENSMUSG00000028248	Pnisr
ENSMUST00000040514	ENSMUSG00000038894	Irs2		ENSMUST00000038287	ENSMUSG00000034765	Dusp5		ENSMUST00000128851	ENSMUSG00000030795	Fus
ENSMUST00000041531	ENSMUSG00000037246	H2-M10.5		ENSMUST00000042970	ENSMUSG00000041695	Kcnj2		ENSMUST00000129577	ENSMUSG00000026034	Clk1
ENSMUST00000045903	ENSMUSG00000032536	Trak1		ENSMUST00000043794	ENSMUSG00000063646	Jakmip1		ENSMUST00000137596	ENSMUSG00000027993	Trim2
ENSMUST00000048207	ENSMUSG00000040554	Aipl1		ENSMUST00000047425	ENSMUSG00000041308	Sntb2		ENSMUST00000153056	ENSMUSG00000021134	Srsf5
ENSMUST00000052164	ENSMUSG00000048337	Npy4r		ENSMUST00000049393	ENSMUSG00000037007	Zfp113		ENSMUST00000165033	ENSMUSG00000038418	Egr1
ENSMUST00000053949	ENSMUSG00000044461	Shisa2		ENSMUST00000049621	ENSMUSG00000048001	Hes5		ENSMUST00000183191	ENSMUSG00000098061	Gm26945
ENSMUST00000056028	ENSMUSG00000042978	Sbk1		ENSMUST00000050027	ENSMUSG00000037362	Nov		ENSMUST00000195025	ENSMUSG00000103220	Gm37728
ENSMUST00000057859	ENSMUSG00000048285	Frmd6		ENSMUST00000050575	ENSMUSG00000045691	Thtpa		ENSMUST00000197342	ENSMUSG00000039735	Fnbp1l
ENSMUST00000059692	ENSMUSG00000031651	Triml1		ENSMUST00000050970	ENSMUSG00000029642	Polr1d		ENSMUST00000204013	ENSMUSG00000029817	Tra2a
ENSMUST00000072887	ENSMUSG00000051885	Olfr664		ENSMUST00000053855	ENSMUSG00000046818	Ddit4l
ENSMUST00000074056	ENSMUSG00000061769	Klra6		ENSMUST00000055738	ENSMUSG00000031431	Tsc22d3
ENSMUST00000074168	ENSMUSG00000059429	Olfr365		ENSMUST00000055770	ENSMUSG00000049539	Hist1h1a
ENSMUST00000077816	ENSMUSG00000058019	Ces5a		ENSMUST00000057243	ENSMUSG00000048572	Tmem252
ENSMUST00000080094	ENSMUSG00000057149	Olfr1301		ENSMUST00000059449	ENSMUSG00000050097	Ces2b
ENSMUST00000082446	ENSMUSG00000064380	Gm26448		ENSMUST00000062125	ENSMUSG00000048429	1810026J23Rik
ENSMUST00000083715	ENSMUSG00000065649	Snora74a		ENSMUST00000067543	ENSMUSG00000032501	Trib1
ENSMUST00000088198	ENSMUSG00000067679	Obp1b		ENSMUST00000068792	ENSMUSG00000055296	Tmem245
ENSMUST00000093658	ENSMUSG00000070167	Snora57		ENSMUST00000069097	ENSMUSG00000028842	Ago3
ENSMUST00000093852	ENSMUSG00000066687	Zbtb16		ENSMUST00000071732	ENSMUSG00000092086	Gm6793
ENSMUST00000095759	ENSMUSG00000071341	Egr4		ENSMUST00000073639	ENSMUSG00000089789	Rdh1
ENSMUST00000098549	ENSMUSG00000074195	Clca4b		ENSMUST00000074043	ENSMUSG00000037465	Klf10
ENSMUST00000099888	ENSMUSG00000075184	F930017D23Rik		ENSMUST00000074651	ENSMUSG00000052783	Grk4
ENSMUST00000107094	ENSMUSG00000052684	Jun		ENSMUST00000079413	ENSMUSG00000024222	Fkbp5
ENSMUST00000108483	ENSMUSG00000030366	Ceacam12		ENSMUST00000079884	ENSMUSG00000058508	Gm10042
ENSMUST00000114107	ENSMUSG00000025964	Adam23		ENSMUST00000080694	ENSMUSG00000058176	Gm5407
ENSMUST00000116892	ENSMUSG00000080542	Gm22710		ENSMUST00000082517	ENSMUSG00000064451	Snora23
ENSMUST00000117445	ENSMUSG00000069825	Spata22		ENSMUST00000082761	ENSMUSG00000096205	Gm22068
ENSMUST00000117909	ENSMUSG00000060508	Nlrp9b		ENSMUST00000082838	ENSMUSG00000064772	Gm25202
ENSMUST00000119036	ENSMUSG00000095820	Gm15098		ENSMUST00000083153	ENSMUSG00000065087	Snord22
ENSMUST00000126381	ENSMUSG00000033685	Ucp2		ENSMUST00000083529	ENSMUSG00000065463	Snord45c
ENSMUST00000126658	ENSMUSG00000074653	Lrrc31		ENSMUST00000083928	ENSMUSG00000065862	Gm24029
ENSMUST00000127492	ENSMUSG00000055407	Map6		ENSMUST00000083936	ENSMUSG00000065870	Rnu3a
ENSMUST00000128180	ENSMUSG00000079603	Gm13218		ENSMUST00000084007	ENSMUSG00000094306	Gm24924
ENSMUST00000129988	ENSMUSG00000086070	8430436N08Rik		ENSMUST00000091789	ENSMUSG00000041607	Mbp
ENSMUST00000135243	ENSMUSG00000036427	Gpi1		ENSMUST00000093183	ENSMUSG00000046345	Smco1
ENSMUST00000141218	ENSMUSG00000019970	Sgk1		ENSMUST00000093684	ENSMUSG00000095969	Rnu1a1
ENSMUST00000144016	ENSMUSG00000015090	Ptgds		ENSMUST00000098307	ENSMUSG00000074026	Gm6091
ENSMUST00000147545	ENSMUSG00000048701	Ccdc6		ENSMUST00000101463	ENSMUSG00000015568	Lpl
ENSMUST00000147610	ENSMUSG00000025512	Chid1		ENSMUST00000101973	ENSMUSG00000096659	Gm25679
ENSMUST00000150632	ENSMUSG00000034175	Rhbdd3		ENSMUST00000103475	ENSMUSG00000076666	Ighv14-4
ENSMUST00000151505	ENSMUSG00000025465	Echs1		ENSMUST00000104850	ENSMUSG00000093935	Gm25529
ENSMUST00000157463	ENSMUSG00000088088	Rmrp		ENSMUST00000105038	ENSMUSG00000078240	Gm3550
ENSMUST00000157560	ENSMUSG00000088185	Scarna2		ENSMUST00000106899	ENSMUSG00000026180	Cxcr2
ENSMUST00000157773	ENSMUSG00000088398	Gm26306		ENSMUST00000108216	ENSMUSG00000017421	Zfp207
ENSMUST00000158080	ENSMUSG00000088705	Gm25549		ENSMUST00000108295	ENSMUSG00000002058	Unc119
ENSMUST00000158608	ENSMUSG00000089233	Gm22202		ENSMUST00000108297	ENSMUSG00000049225	Pdp1
ENSMUST00000162800	ENSMUSG00000025955	Akr1cl		ENSMUST00000108670	ENSMUSG00000052921	Arhgef15
ENSMUST00000166527	ENSMUSG00000093948	Gm10378		ENSMUST00000113028	ENSMUSG00000045414	1190002N15Rik
ENSMUST00000170953	ENSMUSG00000090862	Rps13		ENSMUST00000113402	ENSMUSG00000079457	Gm7609
ENSMUST00000172190	ENSMUSG00000090417	Vmn2r94		ENSMUST00000113596	ENSMUSG00000079477	Rab7
ENSMUST00000173672	ENSMUSG00000092274	Neat1		ENSMUST00000114140	ENSMUSG00000034254	Agpat1
ENSMUST00000173770	ENSMUSG00000092550	Gm20496		ENSMUST00000114703	ENSMUSG00000026748	Plxdc2
ENSMUST00000174877	ENSMUSG00000001027	Scn4a		ENSMUST00000115257	ENSMUSG00000036699	Zcchc12
ENSMUST00000176972	ENSMUSG00000093771	AU023070		ENSMUST00000115894	ENSMUSG00000069053	Uba1y
ENSMUST00000177413	ENSMUSG00000093663	Gm7171		ENSMUST00000116784	ENSMUSG00000080434	Gm23177
ENSMUST00000182560	ENSMUSG00000002107	Celf2		ENSMUST00000116918	ENSMUSG00000095035	Gm22346
ENSMUST00000190666	ENSMUSG00000100826	Snhg14		ENSMUST00000117721	ENSMUSG00000021327	Zkscan3
ENSMUST00000191518	ENSMUSG00000099937	Gm28872		ENSMUST00000119013	ENSMUSG00000084390	Gm15425
ENSMUST00000193379	ENSMUSG00000102817	Gm6185		ENSMUST00000121552	ENSMUSG00000082894	Gm6480
ENSMUST00000193900	ENSMUSG00000102925	Gm37150		ENSMUST00000122610	ENSMUSG00000084559	Mir1906-2
ENSMUST00000194138	ENSMUSG00000097451	Rian		ENSMUST00000123192	ENSMUSG00000040667	Nup88
ENSMUST00000196431	ENSMUSG00000106448	Gm43486		ENSMUST00000123994	ENSMUSG00000028542	Slc6a9
ENSMUST00000198432	ENSMUSG00000070702	Csn1s1		ENSMUST00000124608	ENSMUSG00000021998	Lcp1
ENSMUST00000198757	ENSMUSG00000027797	Dclk1		ENSMUST00000124751	ENSMUSG00000027419	Pcsk2
ENSMUST00000199134	ENSMUSG00000044365	Cxxc4		ENSMUST00000124840	ENSMUSG00000026809	1700026L06Rik
ENSMUST00000200932	ENSMUSG00000079423	Gm3286		ENSMUST00000126534	ENSMUSG00000033685	Ucp2
ENSMUST00000200956	ENSMUSG00000107352	Gm43660		ENSMUST00000127008	ENSMUSG00000074457	S100a16
ENSMUST00000201654	ENSMUSG00000107232	1700017L05Rik		ENSMUST00000127890	ENSMUSG00000037926	Ssh2
ENSMUST00000202425	ENSMUSG00000107148	Gm42888		ENSMUST00000130877	ENSMUSG00000037446	Tulp1
ENSMUST00000203186	ENSMUSG00000107624	Gm44005		ENSMUST00000131147	ENSMUSG00000087028	Gm13387
ENSMUST00000203269	ENSMUSG00000107873	Gm19065		ENSMUST00000132697	ENSMUSG00000022799	Arhgap31
ENSMUST00000203341	ENSMUSG00000030275	Etnk1		ENSMUST00000132720	ENSMUSG00000028932	Psmc2
ENSMUST00000203992	ENSMUSG00000108256	Gm43923		ENSMUST00000133616	ENSMUSG00000055188	Rbm3os
				ENSMUST00000134741	ENSMUSG00000042625	Safb2
				ENSMUST00000135430	ENSMUSG00000078894	2210418O10Rik
				ENSMUST00000136387	ENSMUSG00000071337	Tia1
				ENSMUST00000138092	ENSMUSG00000025511	Tspan4
				ENSMUST00000138295	ENSMUSG00000086919	Gm11497
				ENSMUST00000138468	ENSMUSG00000027598	Itch
				ENSMUST00000139720	ENSMUSG00000030770	Parva
				ENSMUST00000140600	ENSMUSG00000040687	Madd
				ENSMUST00000140665	ENSMUSG00000008690	Ncaph2
				ENSMUST00000141837	ENSMUSG00000018566	Slc2a4
				ENSMUST00000142645	ENSMUSG00000040760	Appl1
				ENSMUST00000142701	ENSMUSG00000029458	Brap
				ENSMUST00000142950	ENSMUSG00000047115	Fam221a
				ENSMUST00000143129	ENSMUSG00000073274	Gm14636
				ENSMUST00000143264	ENSMUSG00000074733	Zfp950
				ENSMUST00000143329	ENSMUSG00000039913	Pak7
				ENSMUST00000143918	ENSMUSG00000057738	Sptan1
				ENSMUST00000143952	ENSMUSG00000047804	Akap10
				ENSMUST00000145013	ENSMUSG00000020273	Papolg
				ENSMUST00000146233	ENSMUSG00000040483	Xaf1
				ENSMUST00000146404	ENSMUSG00000085950	Gm13589
				ENSMUST00000148561	ENSMUSG00000028248	Pnisr
				ENSMUST00000148843	ENSMUSG00000066037	Hnrnpr
				ENSMUST00000150428	ENSMUSG00000038244	Mical2
				ENSMUST00000150704	ENSMUSG00000036099	Vezt
				ENSMUST00000150801	ENSMUSG00000073274	Gm14636
				ENSMUST00000155318	ENSMUSG00000020674	Pxdn
				ENSMUST00000155984	ENSMUSG00000056342	Usp34
				ENSMUST00000156089	ENSMUSG00000023088	Abcc1
				ENSMUST00000156158	ENSMUSG00000042726	Trafd1
				ENSMUST00000157194	ENSMUSG00000087819	Gm25117
				ENSMUST00000157729	ENSMUSG00000088354	Gm27592
				ENSMUST00000158323	ENSMUSG00000088948	Gm23262
				ENSMUST00000160159	ENSMUSG00000020181	Nav3
				ENSMUST00000160210	ENSMUSG00000026335	Pam
				ENSMUST00000161155	ENSMUSG00000040265	Dnm3
				ENSMUST00000162142	ENSMUSG00000022351	Sqle
				ENSMUST00000163625	ENSMUSG00000028782	Adgrb2
				ENSMUST00000164606	ENSMUSG00000026740	Dnajc1
				ENSMUST00000164787	ENSMUSG00000040420	Cdh18
				ENSMUST00000166799	ENSMUSG00000010066	Cacna2d2
				ENSMUST00000167053	ENSMUSG00000039716	Dock3
				ENSMUST00000167323	ENSMUSG00000090698	Apold1
				ENSMUST00000167514	ENSMUSG00000092622	Khdc3
				ENSMUST00000169308	ENSMUSG00000025731	0610011F06Rik
				ENSMUST00000169413	ENSMUSG00000027894	Slc6a17
				ENSMUST00000170927	ENSMUSG00000002297	Dbf4
				ENSMUST00000174201	ENSMUSG00000056888	Glipr1
				ENSMUST00000174274	ENSMUSG00000022394	L3mbtl2
				ENSMUST00000174716	ENSMUSG00000037470	Uggt1
				ENSMUST00000174941	ENSMUSG00000095209	Gm22398
				ENSMUST00000174946	ENSMUSG00000092687	Gm25744
				ENSMUST00000174949	ENSMUSG00000093388	Gm22655
				ENSMUST00000175055	ENSMUSG00000092796	Gm22692
				ENSMUST00000175073	ENSMUSG00000092814	Gm23638
				ENSMUST00000175099	ENSMUSG00000092840	Gm24331
				ENSMUST00000175167	ENSMUSG00000092908	Gm25731
				ENSMUST00000175169	ENSMUSG00000095747	Gm22475
				ENSMUST00000175195	ENSMUSG00000094528	Gm22914
				ENSMUST00000175237	ENSMUSG00000092978	Gm25070
				ENSMUST00000175318	ENSMUSG00000093059	Gm24809
				ENSMUST00000175329	ENSMUSG00000093070	Gm25952
				ENSMUST00000175424	ENSMUSG00000105494	Gm44310
				ENSMUST00000175449	ENSMUSG00000093190	Gm22875
				ENSMUST00000175462	ENSMUSG00000093203	Gm22411
				ENSMUST00000175494	ENSMUSG00000094486	Gm23268
				ENSMUST00000175516	ENSMUSG00000095943	Gm25197
				ENSMUST00000175561	ENSMUSG00000093302	Gm23801
				ENSMUST00000175618	ENSMUSG00000093359	Gm23292
				ENSMUST00000176093	ENSMUSG00000010110	Stx5a
				ENSMUST00000176759	ENSMUSG00000038331	Satb2
				ENSMUST00000176801	ENSMUSG00000022321	Cdh10
				ENSMUST00000176930	ENSMUSG00000093684	Gm27857
				ENSMUST00000176989	ENSMUSG00000093503	Vmn2r-ps4
				ENSMUST00000177346	ENSMUSG00000037112	Sik2
				ENSMUST00000177427	ENSMUSG00000093780	Gm22395
				ENSMUST00000177653	ENSMUSG00000096214	Gm22634
				ENSMUST00000177656	ENSMUSG00000095947	Gm25195
				ENSMUST00000178007	ENSMUSG00000093965	Gm24370
				ENSMUST00000178056	ENSMUSG00000080316	Spaca6
				ENSMUST00000178068	ENSMUSG00000095989	Gm23049
				ENSMUST00000178123	ENSMUSG00000095425	Gm24417
				ENSMUST00000178183	ENSMUSG00000095245	Gm24753
				ENSMUST00000178283	ENSMUSG00000094702	Gm24485
				ENSMUST00000178469	ENSMUSG00000096206	Gm22317
				ENSMUST00000178492	ENSMUSG00000094807	Gm24975
				ENSMUST00000178964	ENSMUSG00000096309	Gm25208
				ENSMUST00000179621	ENSMUSG00000096349	Gm22513
				ENSMUST00000179675	ENSMUSG00000094826	Gm23804
				ENSMUST00000180144	ENSMUSG00000096112	Gm26269
				ENSMUST00000180209	ENSMUSG00000096184	Gm23304
				ENSMUST00000180257	ENSMUSG00000093791	Gm24092
				ENSMUST00000180691	ENSMUSG00000097231	Gm26852
				ENSMUST00000181107	ENSMUSG00000097736	9530059O14Rik
				ENSMUST00000181440	ENSMUSG00000097163	BC051077
				ENSMUST00000181534	ENSMUSG00000097356	Gm26774
				ENSMUST00000181637	ENSMUSG00000097226	Gm26600
				ENSMUST00000181705	ENSMUSG00000097265	Gm26803
				ENSMUST00000181775	ENSMUSG00000097390	Gm26785
				ENSMUST00000182480	ENSMUSG00000004562	Arhgef40
				ENSMUST00000182991	ENSMUSG00000098240	Gm4575
				ENSMUST00000183251	ENSMUSG00000090812	Samd15
				ENSMUST00000183340	ENSMUSG00000098898	Gm27754
				ENSMUST00000184215	ENSMUSG00000098798	Gm27288
				ENSMUST00000184463	ENSMUSG00000098823	Mir8111
				ENSMUST00000184596	ENSMUSG00000098494	Gm27690
				ENSMUST00000184994	ENSMUSG00000098284	A330093E20Rik
				ENSMUST00000185136	ENSMUSG00000098638	Gm27743
				ENSMUST00000185253	ENSMUSG00000068349	Gml
				ENSMUST00000186169	ENSMUSG00000100779	Gm29292
				ENSMUST00000186933	ENSMUSG00000032565	Nudt16
				ENSMUST00000187605	ENSMUSG00000056211	R3hdm1
				ENSMUST00000187900	ENSMUSG00000056211	R3hdm1
				ENSMUST00000188435	ENSMUSG00000101773	2210420H20Rik
				ENSMUST00000189301	ENSMUSG00000041872	Il17f
				ENSMUST00000189430	ENSMUSG00000099615	Gm28362
				ENSMUST00000190006	ENSMUSG00000101447	Gm28826
				ENSMUST00000190826	ENSMUSG00000063522	2010109I03Rik
				ENSMUST00000191338	ENSMUSG00000025915	Sgk3
				ENSMUST00000191756	ENSMUSG00000103191	Gm37646
				ENSMUST00000192225	ENSMUSG00000026575	Nme7
				ENSMUST00000192386	ENSMUSG00000103625	Gm37357
				ENSMUST00000193214	ENSMUSG00000104277	Gm38299
				ENSMUST00000193585	ENSMUSG00000103241	Gm38089
				ENSMUST00000194532	ENSMUSG00000102289	Gm31258
				ENSMUST00000194661	ENSMUSG00000096967	Gm26621
				ENSMUST00000194716	ENSMUSG00000103672	Gm37621
				ENSMUST00000194772	ENSMUSG00000028068	Iqgap3
				ENSMUST00000195406	ENSMUSG00000094763	Gm1647
				ENSMUST00000197090	ENSMUSG00000105287	Gm43577
				ENSMUST00000197165	ENSMUSG00000104592	Gm42721
				ENSMUST00000197673	ENSMUSG00000061882	Ccdc62
				ENSMUST00000197850	ENSMUSG00000032482	Cspg5
				ENSMUST00000198359	ENSMUSG00000104629	Trav13n-1
				ENSMUST00000198504	ENSMUSG00000072845	Tmprss11a
				ENSMUST00000198568	ENSMUSG00000105931	Gm43014
				ENSMUST00000199277	ENSMUSG00000039883	Lrrc17
				ENSMUST00000199703	ENSMUSG00000079451	Tmprss11g
				ENSMUST00000199788	ENSMUSG00000104793	Gm43756
				ENSMUST00000199972	ENSMUSG00000106536	Gm42508
				ENSMUST00000200030	ENSMUSG00000105210	Mir3544
				ENSMUST00000200213	ENSMUSG00000108394
				ENSMUST00000202192	ENSMUSG00000041147	Brca2
				ENSMUST00000202707	ENSMUSG00000038456	Dennd2a
				ENSMUST00000203092	ENSMUSG00000107881	Gm44250
				ENSMUST00000203285	ENSMUSG00000107599	Gm43981
				ENSMUST00000203708	ENSMUSG00000107706	Gm44022
				ENSMUST00000203742	ENSMUSG00000032652	Crebl2
				ENSMUST00000204808	ENSMUSG00000108072	Gm20362
				ENSMUST00000205001	ENSMUSG00000107894	Gm10388
				ENSMUST00000205775	ENSMUSG00000108446
				ENSMUST00000206038	ENSMUSG00000060034	Ctf2
				ENSMUST00000206348	ENSMUSG00000002603	Tgfb1
				ENSMUST00000206449	ENSMUSG00000108365
				ENSMUST00000206566	ENSMUSG00000108634
				ENSMUST00000206747	ENSMUSG00000097178	2310002F09Rik
